# Supplementary material for: Exfoliation of a two-dimensional cationic inorganic network as a new paradigm for high-capacity CrVI-anion capture
Source: Royal Society of Chemistry journal article supplement (doi:10.1039/c7cc04375a), 2017-01-01
Supplement: c7cc04375a1.pdf [file c7cc04375a1.pdf]

# Supporting Information

## Exfoliation of A Two-Dimensional Cationic Inorganic Network as a New Paradigm for High-Capacity Cr<sup>VI</sup>-Anion Capture

Huimin Yang and Honghan Fei\*

Shanghai Key Laboratory of Chemical Assessment and Sustainability, School of Chemical Science and Engineering, Tongji University, Shanghai 200092, P. R. China

\*To whom correspondence should be addressed.

E-mail: fei@tongji.edu.cn

## General Methods

Starting materials and solvents were purchased from commercial suppliers (Sigma-Aldrich, Alfa Aesar, TCI, et al) and used without further purification. Elemental analysis (EA) for C, H, and N were operated on a FLASH EA 1112 element analyzer. Thermogravimetric analysis (TGA) were carried out in N<sub>2</sub> stream (60 mL/min) on a NETZSCH STA 409 PC/PG differential thermal analyzer running from room temperature to 800 °C with a heating rate of 5 °C/min. Fourier-transform infrared (FT-IR) spectrum were recorded using a Nicolet iS10 spectrophotometer with KBr pellets in 4000~400 cm<sup>-1</sup> region.  $\alpha$ -Co(OH)<sub>2</sub> nanosheet<sup>S1</sup> and SLUG-26<sup>S2</sup> was synthesized according to the previously reported procedure.

## Experimental

*Hydrothermal synthesis of TJU-1.* A mixture of Cu(NO<sub>3</sub>)<sub>2</sub>·3H<sub>2</sub>O (0.56 g, 2.5 mmol), 1,4-butanedisulfonate disodium salt (NaO<sub>3</sub>S(CH<sub>2</sub>)<sub>4</sub>SO<sub>3</sub>Na, 0.3 g, 1.2 mmol), cetyltrimethylammonium bromide ((C<sub>16</sub>H<sub>33</sub>)N(CH<sub>3</sub>)<sub>3</sub>Br, 0.025 g, CTAB), and deionized water (8 mL) were added into a 15 mL Teflon-lined autoclave. The autoclave was then sealed and heated statically at 150 °C for 3 days under autogenous pressure. After cooling down to room temperature, blue plate-like crystals were isolated after filtration and rinsed by deionized water and acetone (yield: 93 mg, ~50 % based on alkanedisulfonate ligand).

*Synthesis of MgAl-LDH (Cl<sup>-</sup> form).* 100 mg Mg-Al-CO<sub>3</sub> LDHs was added in to a 100 mL solution containing 1M NaCl and 3.3 mM HCl, the mixture was shook for 12

h. After filtering, the Mg-Al-Cl LDHs was dried at 60 °C and then calcined at 500 °C for 2 h.

*Cr<sup>VI</sup> Capture Experiments.* 16 mg ( $2.5 \times 10^{-2}$  mol) as-synthesized TJU-1 were introduced into 12.5 ml aqueous solution containing 6 mg ( $2.5 \times 10^{-2}$  mol) Na<sub>2</sub>CrO<sub>4</sub> or 7.4 mg ( $2.5 \times 10^{-2}$  mol) K<sub>2</sub>Cr<sub>2</sub>O<sub>7</sub>. The mixture was then placed onto a shaker to shake continuously for up to 48 h to allow for complete exchange. Both the solids and solution were monitored at various time intervals to follow the exchange progress. Both the activated hydrotalcite (MgAl-LDH Cl<sup>-</sup> form) and activated carbon were also studied for comparison of adsorption capacity. 8 mg ( $2.5 \times 10^{-2}$  mol) the activated hydrotalcite (MgAl-LDH Cl<sup>-</sup> form) or 30 mg active carbon (0.25 mol) was introduced into the same solution as above, with the same reaction and monitoring process.

*Cr<sup>VI</sup> Selectivity Studies.* 16 mg ( $2.5 \times 10^{-2}$  mol) as-synthesized TJU-1 were introduced into 12.5 ml aqueous solution containing 6 mg ( $2.5 \times 10^{-2}$  mol) Na<sub>2</sub>CrO<sub>4</sub> or 7.4 mg ( $2.5 \times 10^{-2}$  mol) K<sub>2</sub>Cr<sub>2</sub>O<sub>7</sub>. Then 18 mg KCl (0.25 mol) or 21 mg (0.25 mol) NaNO<sub>3</sub> or 35 mg (0.25 mol) Na<sub>2</sub>SO<sub>4</sub> or 41 mg (0.25 mol) Na<sub>3</sub>PO<sub>4</sub> was added. The solution was monitored under mild shaking for up to 48 hours. Both the solids and solution were monitored at various time intervals to follow the exchange progress. After the completing of Cr<sup>VI</sup> trapping, the solid products were isolated by filtration and rinsed by water/acetone, followed by Fourier transform infrared (FTIR) spectroscopy and powder X-ray diffraction (PXRD) measurements to support that TJU-1 selectively trapped the Cr<sup>VI</sup> over interfering ions.

*Cr<sup>VI</sup> Capture in Chromate-Contaminated Electroplating Wastewater.* The

wastewater was collected directly from the plant, and followed by diluting and adjusting the pH to 4. Then, 6 mg ( $2.5 \times 10^{-2}$  mol)  $\text{Na}_2\text{CrO}_4$  was added into 12.5 mL wastewater, and the mixture was filtered. The concentrations of the competing heavy metal ions in the pretreated wastewater were listed in Table S3. The  $\text{Cr}^{\text{VI}}$  capture experiment was carried out by introducing 16 mg ( $2.5 \times 10^{-2}$  mol) as-synthesized TJU-1 in the pretreated wastewater, and the mixture was incubated at room temperature for 16 h. The anion-exchange process was monitored by ICP. After 16 h, the reaction was completed, and the solids were isolated *via* centrifugation.

*Regeneration of TJU-1 for Chromate Capture.* The nanosheets after chromate trapping were collected *via* centrifugation, followed by washing with water. 0.28 g nanosheets (2.5 mmol based on Cu), 1,4-butanedisulfonate disodium salt ( $\text{NaO}_3\text{S}(\text{CH}_2)_4\text{SO}_3\text{Na}$ , 0.3 g, 1.2 mmol), cetyltrimethylammonium bromide ( $(\text{C}_{16}\text{H}_{33})\text{N}(\text{CH}_3)_3\text{Br}$ , 0.025 g, CTAB), and deionized water (8 mL) were added into a 15 mL Teflon-lined autoclave. A diluted  $\text{HNO}_3$  solution was used to adjust the pH of the mixture to about 4. The autoclave was then sealed and heated statically at 150 °C for 3 days under autogenous pressure. After cooling down to room temperature, the solids were isolated after filtration and rinsed by deionized water. The dried solids were directly employed in a new round of chromate capture experiment.

*Powder X-ray Diffraction (PXRD) Analysis.* PXRD data were collected at ambient temperature on a Bruker D8 Advance diffractometer at 40 kV, 40 mA for Cu

K $\alpha$  ( $\lambda=1.5418$  Å), with a scan speed of 0.2 sec/step, a step size of 0.02° in 2 $\theta$ , and a 2 $\theta$  range of ~5 to 45 ° (sample dependent).

*Scanning Electron Microscopy (SEM).* A Hitachi S-4800 instrument was used for acquiring images using a 3 kV energy source under vacuum.

*Transmission Electron Microscopy (TEM).* A high-resolution transmission electron microscopy (HRTEM, Joel-2010) was used for acquiring images under 200 kV.

*Tapping-Mode Atomic Force Microscopy (AFM).* The nanosheet sample was drop-casted onto the Mica sheet. A Bruker multimode 8 was used for testing the morphology.

*X-ray Photoelectron Spectroscopy (XPS).* An AXIS ULTRA DLD instrument was used for acquiring the XPS measurements. The XPS data was analyzed by the XPSPEAK41 software.

*X-ray Crystallography.* Single crystal data were recorded using a Bruker APEX II CCD area detector X-ray diffractometer using graphite monochromated Mo-K $\alpha$  ( $\lambda = 0.71073$  Å). The structures were solved by direct methods and expanded routinely. The models were refined by full-matrix least-squares analysis of  $F^2$  against all reflections. All non-hydrogen atoms were refined with anisotropic thermal displacement parameters. Programs used: APEX-II v2.1.4; SHELXTL v6.14;<sup>S3</sup> Diamond v3.2.

## Supporting Figures and Tables

**Table S1. A Crystallographic Comparison Between a Single Inorganic Layer of LDHs and a Single Layer of TJU-1.**

| Material                      | LDHs                               | TJU-1                              |
|-------------------------------|------------------------------------|------------------------------------|
| Chemical Formula              | $M(OH)_2^a$                        | $[Cu_4(OH)_6]^{2+}$                |
| Ratio of Metals to Hydroxides | 1:2                                | 2:3                                |
| Metal Coordination Number     | 6-coordinate<br>(saturated)        | 4 or 5-coordinate<br>(unsaturated) |
| Metal Charge                  | $M^{2+}$ and $M^{3+}$ <sup>a</sup> | $Cu^{2+}$                          |

<sup>a</sup> M represents both divalent and trivalent metals in LDHs

**Table S2. Adsorption capacity of chromate and dichromate with different materials under the identical condition, and the concentration is monitored by ICP.**

| Anion                        | Materials <sup>a</sup> | Competing ions <sup>b</sup> | Capacity (mg/g) |
|------------------------------|------------------------|-----------------------------|-----------------|
| $\text{CrO}_4^{2-}$          | TJU-1                  | none                        | 241             |
|                              |                        | $\text{Cl}^-$               | 241             |
|                              |                        | $\text{NO}_3^-$             | 234             |
|                              |                        | $\text{SO}_4^{2-}$          | 237             |
|                              | Calcined LDH           | none                        | 111             |
| $\text{Cr}_2\text{O}_7^{2-}$ | Active carbon          | none                        | 40              |
|                              | TJU-1                  | none                        | 278             |
|                              |                        | $\text{Cl}^-$               | 263             |
|                              |                        | $\text{NO}_3^-$             | 263             |
|                              |                        | $\text{HCO}_3^-$            | 267             |
|                              | Calcined LDH           | none                        | 122             |
|                              | Active carbon          | none                        | 3.6             |

<sup>a</sup> The experiments were carried out with equimolar amount of TJU-1 and  $\text{Cr}^{\text{VI}}$ -based anions (0.025 mmol) in 12.5 mL water.

<sup>b</sup> Competing anions were introduced in 10 molar fold excess.

**Table S3. The concentration of elements in the electroplating wastewater diluted.**

| elements | Concentration (mg/L) |
|----------|----------------------|
| K        | 3                    |
| Cu       | 235                  |
| Ni       | 2.7                  |
| As       | 0.2                  |
| Cr       | 0.05                 |
| Mg       | 0.3                  |
| Ag       | 0.05                 |
| Al       | 0.4                  |
| Si       | 0.4                  |

**Table S4. A comparison of Dichromate Capture Capacity and Selectivity with Some Well-Studied Examples in Literature.**

| Materials                                              | Capacity<br>$\text{Cr}_2\text{O}_7^{2-}$ (mg/g) | Selectivity (competing anions) <sup>a</sup>                                                                               |
|--------------------------------------------------------|-------------------------------------------------|---------------------------------------------------------------------------------------------------------------------------|
| FIR-53 (MOF) <sup>[S4]</sup>                           | 74                                              | $\text{Cl}^-$ , $\text{Br}^-$ , $\text{NO}_3^-$                                                                           |
| FIR-54 (MOF) <sup>[S4]</sup>                           | 103                                             | $\text{Cl}^-$ , $\text{Br}^-$ , $\text{NO}_3^-$                                                                           |
| TMU-30 (MOF) <sup>[S5]</sup>                           | 145                                             | $\text{Na}^+$ , $\text{K}^+$ , $\text{Cu}^{2+}$ , $\text{Cd}^{2+}$ , $\text{Cr}^{3+}$                                     |
| Ni-MOF- $\text{SO}_4$ <sup>[S6]</sup>                  | 166                                             | $\text{NO}_3^-$ , $\text{ClO}_4^-$ , $\text{BF}_4^-$ , $\text{CF}_3\text{SO}_3^-$ ,<br>$\text{ClO}_4^-$ , $\text{BF}_4^-$ |
| ABT $2\text{ClO}_4$<br>(MOF) <sup>[S7]</sup>           | 199                                             | $\text{CF}_3\text{SO}_3^-$ , $\text{NO}_3^-$ , $\text{BF}_4^-$                                                            |
| MOR-1-HA <sup>[S8]</sup>                               | 242                                             | $\text{Cl}^-$ , $\text{Br}^-$ , $\text{NO}_3^-$ , $\text{SO}_4^{2-}$                                                      |
| ZJU-101 (MOF) <sup>[S9]</sup>                          | 245                                             | $\text{Cl}^-$ , $\text{Br}^-$ , $\text{NO}_3^-$ , $\text{SO}_4^{2-}$ , $\text{I}^-$ , $\text{F}^-$                        |
| Graphene<br>nanocomposites <sup>[S10]</sup>            | 1.03                                            | n.d                                                                                                                       |
| Activated carbon <sup>[S11]</sup>                      | 112.36                                          | n.d.                                                                                                                      |
| 2-D $\text{Ti}_3\text{C}_2\text{T}_x$ <sup>[S12]</sup> | 250                                             | n.d.                                                                                                                      |
| <b>TJU-1 (This Work)</b>                               | <b>305</b>                                      | <b><math>\text{Cl}^-</math>, <math>\text{NO}_3^-</math>, <math>\text{SO}_4^{2-}</math>, <math>\text{HCO}_3^-</math></b>   |

<sup>a</sup> n.d.=not determined

**Table S5. Crystal data and structure refinement for TJU-1.**

|                                        |                                                  |                           |
|----------------------------------------|--------------------------------------------------|---------------------------|
| Empirical formula                      | Cu <sub>2</sub> C <sub>2</sub> O <sub>6</sub> S  |                           |
| Formula weight                         | 279.16                                           |                           |
| Temperature                            | 293(2) K                                         |                           |
| Wavelength                             | 0.71073 Å                                        |                           |
| Crystal system                         | Monoclinic                                       |                           |
| Space group                            | P 21/m                                           |                           |
| Unit cell dimensions                   | $a = 5.6115(15)$ Å                               | $\alpha = 90^\circ$       |
|                                        | $b = 6.0587(12)$ Å                               | $\beta = 93.612(7)^\circ$ |
|                                        | $c = 10.068(2)$ Å                                | $\gamma = 90^\circ$       |
| Volume                                 | 341.62(13) Å <sup>3</sup>                        |                           |
| Z                                      | 2                                                |                           |
| Density (calculated)                   | 2.714 g.cm <sup>-3</sup>                         |                           |
| Absorption coefficient ( $\mu$ )       | 6.504 mm <sup>-1</sup>                           |                           |
| F(000)                                 | 268                                              |                           |
| Crystal size                           | 0.5 × 0.5 × 0.1 mm <sup>3</sup>                  |                           |
| $\omega$ range for data collection     | 3.64 to 27.47 °                                  |                           |
| Index ranges                           | -7 ≤ h ≤ 7, -7 ≤ k ≤ 7, -13 ≤ l ≤ 12             |                           |
| Reflections collected                  | 4382                                             |                           |
| Independent reflections                | 842 [ $R_{\text{int}} = 0.0198$ ]                |                           |
| Completeness to $\theta = 27.47^\circ$ | 97.8 %                                           |                           |
| Absorption correction                  | Empirical                                        |                           |
| Max. and min. transmission             | 0.7456 and 0.5008                                |                           |
| Refinement method                      | Full-matrix least-squares on $F^2$               |                           |
| Data / restraints / parameters         | 842 / 3 / 68                                     |                           |
| Goodness-of-fit on $F^2$               | 1.096                                            |                           |
| Final R indices [ $I > 2\sigma(I)$ ]   | $R_1 = 0.0303$ , $wR_2 = 0.0891$                 |                           |
| R indices (all data)                   | $R_1 = 0.0317$ , $wR_2 = 0.0902$                 |                           |
| Largest diff. peak and hole            | 0.868 and -0.712 e <sup>-</sup> .Å <sup>-3</sup> |                           |

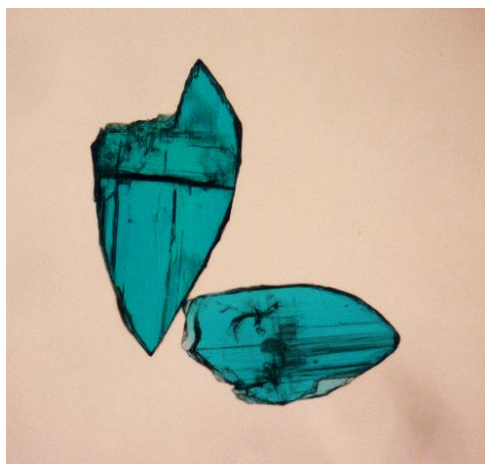

Figure S1. Optical microscope images of TJU-1.

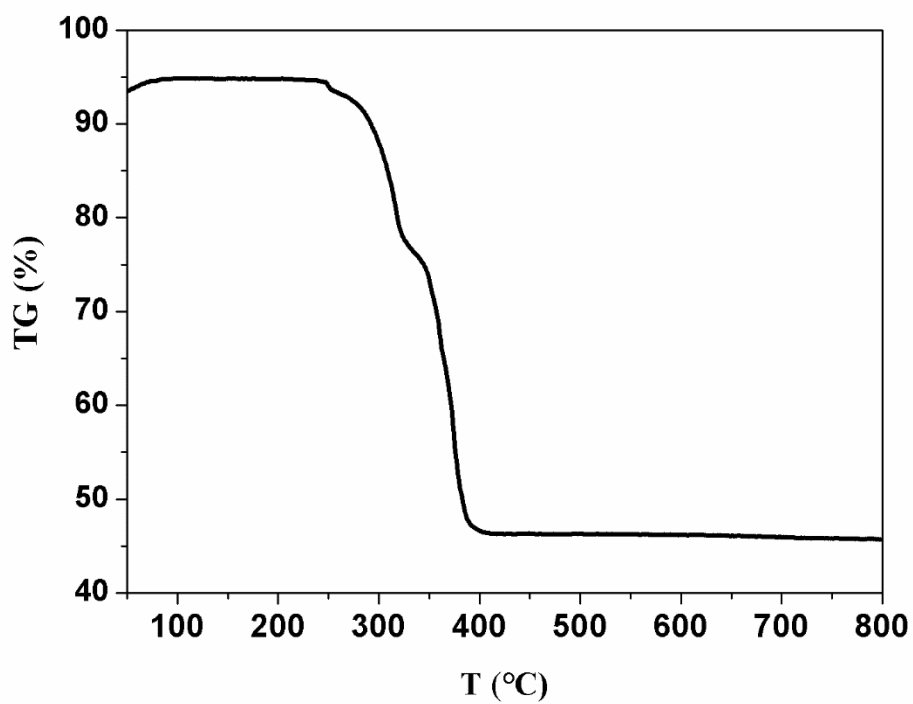

Figure S2. TGA of TJU-1 in N<sub>2</sub> stream.

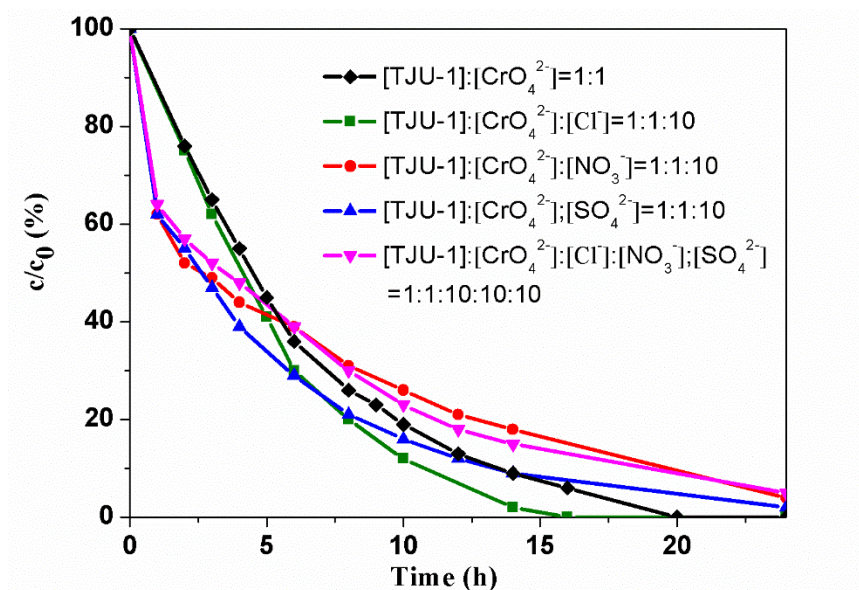

Figure S3. Concentration of  $\text{CrO}_4^{2-}$  captured via TJU-1 with different interfering ions as a function of time.

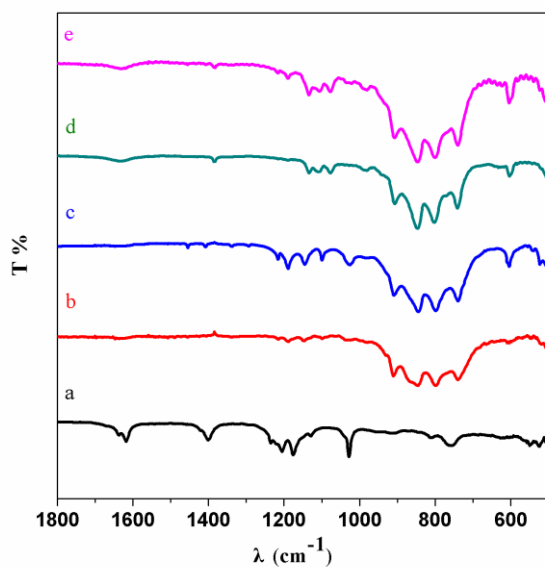

Figure S4. FTIR spectrum of as-synthesized TJU-1 (a, black) and the solids after  $\text{CrO}_4^{2-}$  capture with 10-fold molar excess of  $\text{Cl}^-$  (b, red); 10-fold molar excess of  $\text{NO}_3^-$  (c, blue); (d) 10-fold molar excess of  $\text{SO}_4^{2-}$  (d, cyan); and 10-fold molar excess of  $\text{Cl}^-$ ,  $\text{NO}_3^-$  and  $\text{SO}_4^{2-}$ .

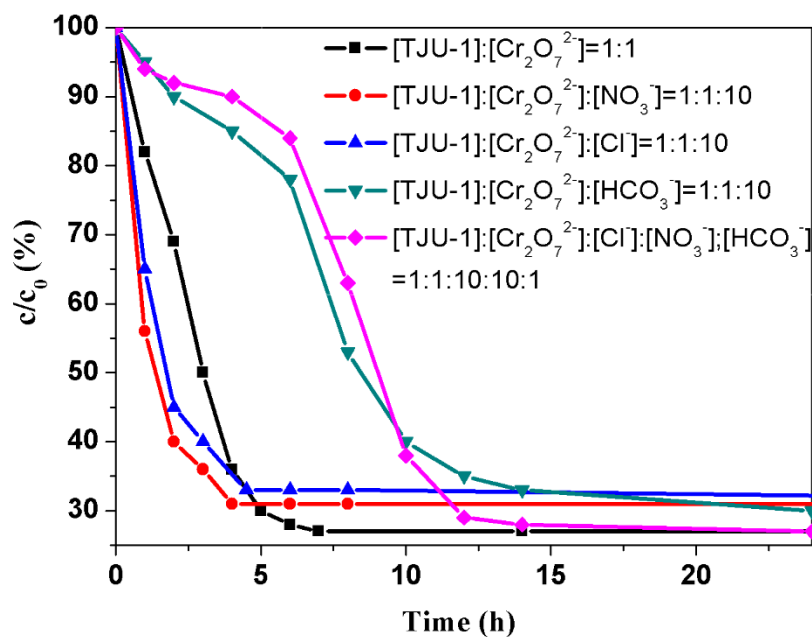

Figure S5. Concentration of  $\text{Cr}_2\text{O}_7^{2-}$  via TJU-1 with different interfering ions as a function of time.

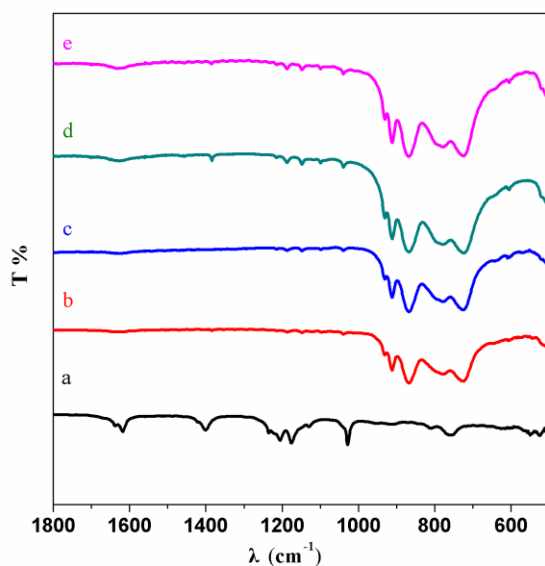

Figure S6. FTIR spectrum of as-synthesized TJU-1 (a, black) and the solids after  $\text{Cr}_2\text{O}_7^{2-}$  capture with 10-fold molar excess of  $\text{Cl}^-$  (b, red); 10-fold molar excess of  $\text{NO}_3^-$  (c, blue); (d) equal molar of  $\text{HCO}_3^-$  (d, cyan); and 10-fold molar excess of  $\text{Cl}^-$ ,  $\text{NO}_3^-$  and  $\text{SO}_4^{2-}$ .

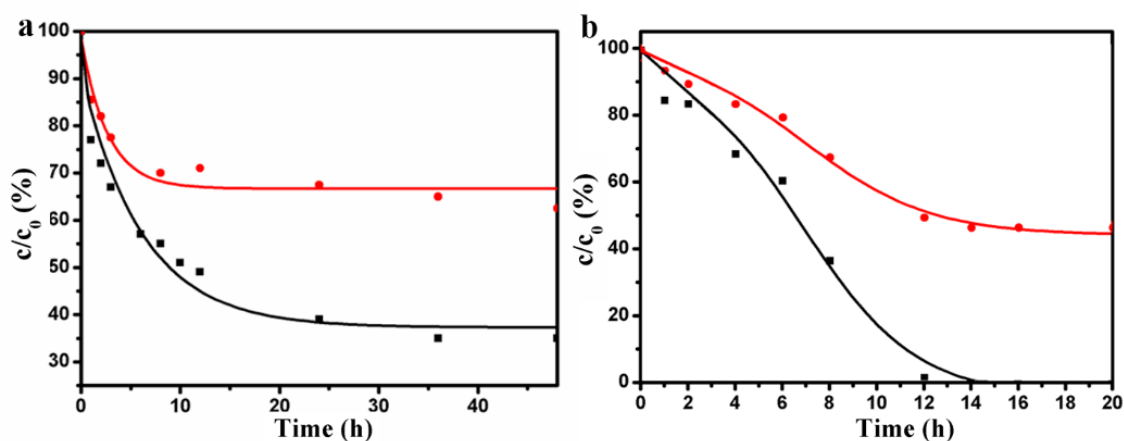

Figure S7. Left: Concentration of  $\text{CrO}_4^{2-}$  as a function of time for TJU-1 capture with the presence of two-fold molar amount of  $\text{Na}_2\text{CrO}_4$  (black) and four-fold molar amount of  $\text{Na}_2\text{CrO}_4$  (red). Right: Concentration of  $\text{Cr}_2\text{O}_7^{2-}$  and  $\text{CrO}_4^{2-}$  as a function of time for TJU-1 in a ratio of 2:1:1 (TJU-1:  $\text{Cr}_2\text{O}_7^{2-}$ : $\text{CrO}_4^{2-}$ ) (black) and in a ratio of 1:1:1 (TJU-1:  $\text{Cr}_2\text{O}_7^{2-}$ : $\text{CrO}_4^{2-}$ ) (red).

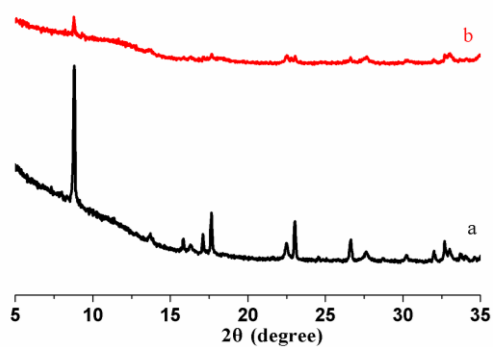

Figure S8. PXRD of TJU-1 in  $\text{CrO}_4^{2-}$  capture experiments after 12 h (a, black) and 48 h (b, red). The presence of an amorphous-like broad diffraction in a  $2\theta$  range of 3-15° is likely due to the scattering from an aggregate of exfoliated nanosheets.

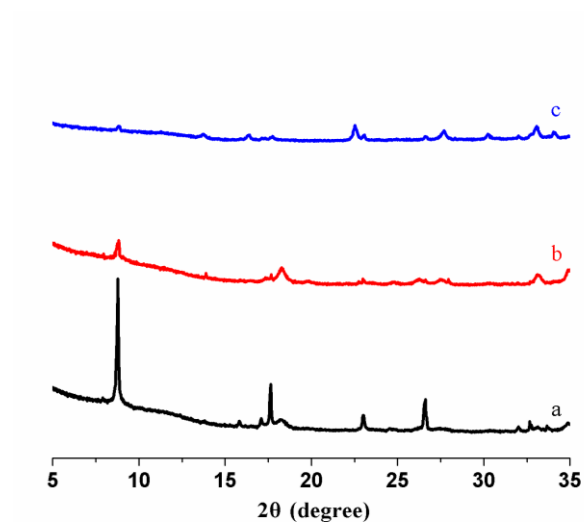

Figure S9. PXRD of TJU-1 in  $\text{Cr}_2\text{O}_7^{2-}$  capture experiments after 6 h (a, black), 12 h (b, red) and 24 h (c, blue). The presence of an amorphous-like broad diffraction in a  $2\theta$  range of  $3\text{--}15^\circ$  is likely due to the scattering from an aggregate of exfoliated nanosheets.

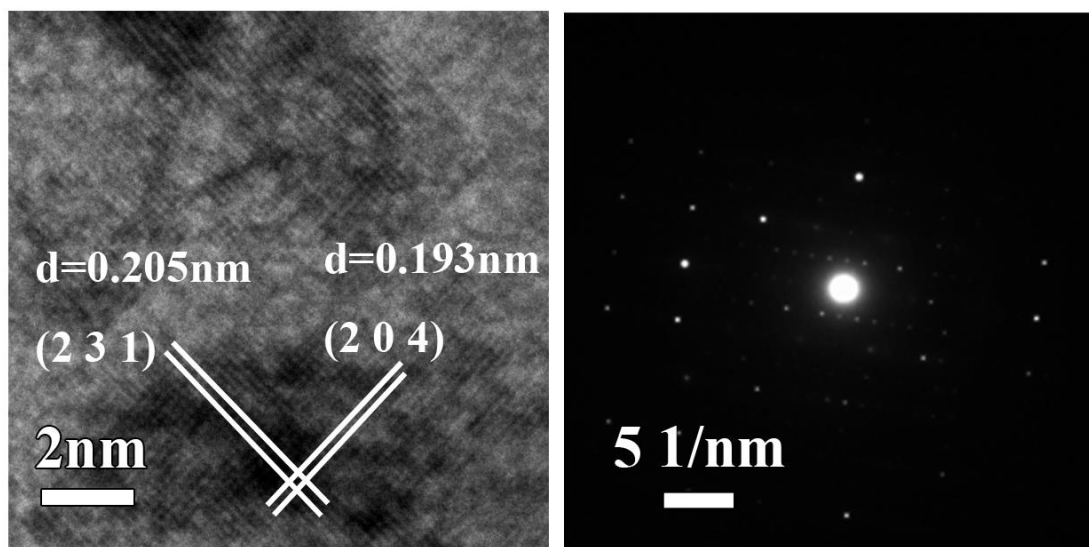

Figure S10. HRTEM and SAED characterization of the TJU-1 solids after chromate treatment.

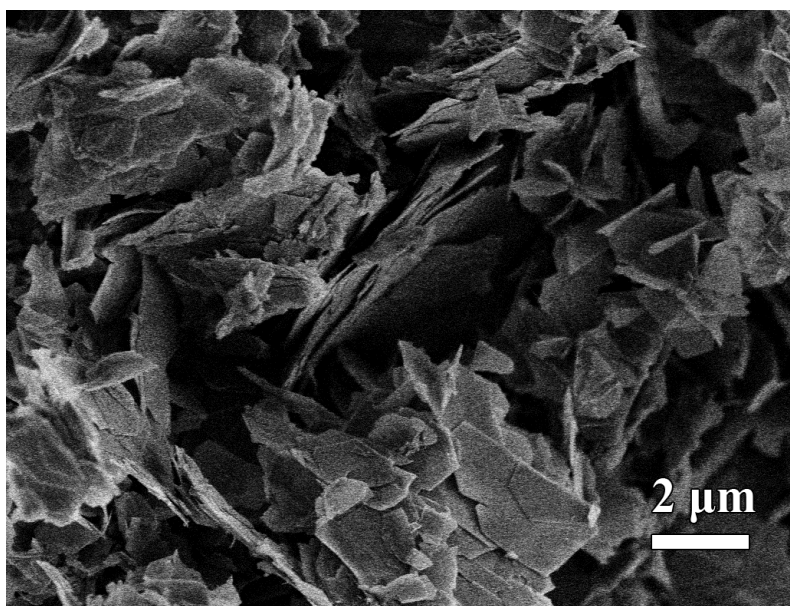

Figure S11. SEM of  $\alpha$ -Co(OH) $_2$  after chromate treatment.

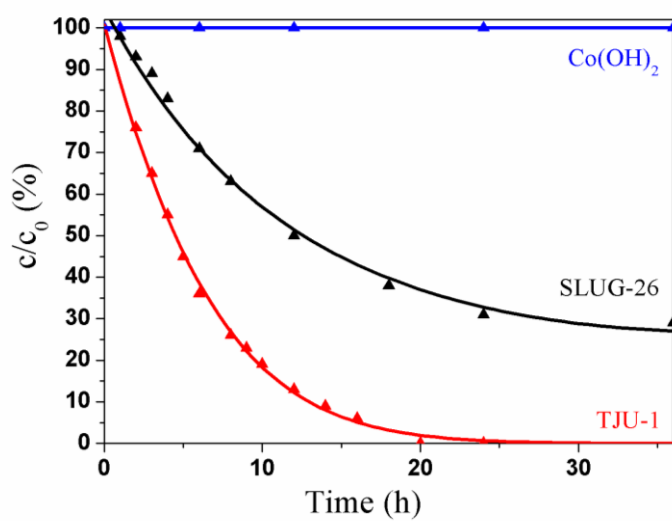

Figure S12. Concentration of  $\text{CrO}_4^{2-}$  as a function of time for neutral-charged  $\text{Co(OH)}_2$  (blue), SLUG-26 (black) and TJU-1 (red) capture with  $\text{CrO}_4^{2-}$ .

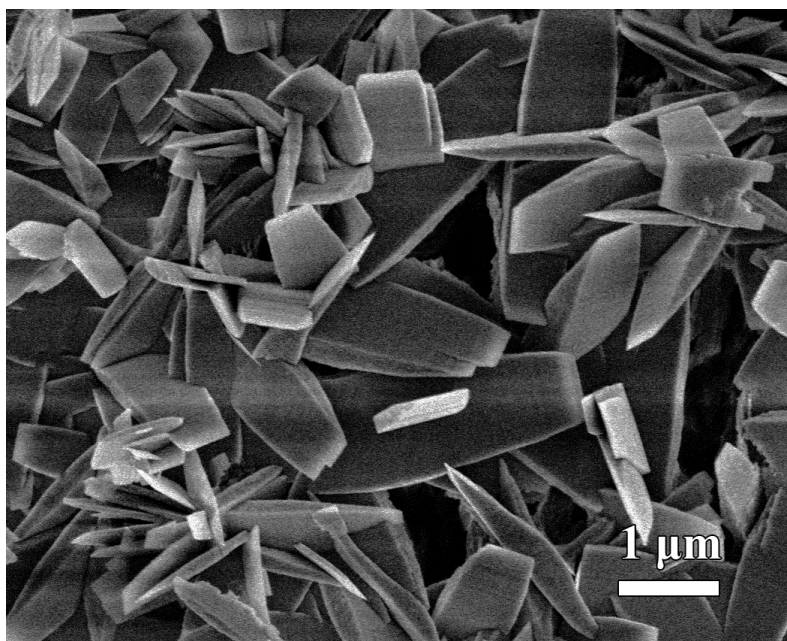

Figure S13. SEM of SLUG-26 after chromate treatment.

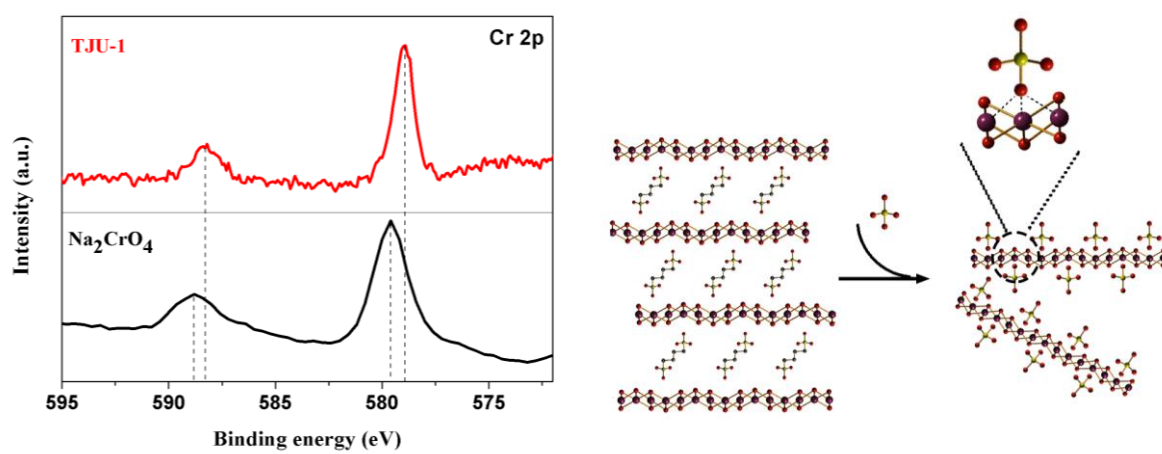

Figure S14. Left: XPS of TJU-1 solids after chromate capture (top) and  $\text{Na}_2\text{CrO}_4$  (bottom). Right: Schematic of chromate capture *via* TJU-1 and its possible formation of  $\text{O}_3\text{Cr}-\text{O} \cdots \text{Cu}$  moieties.

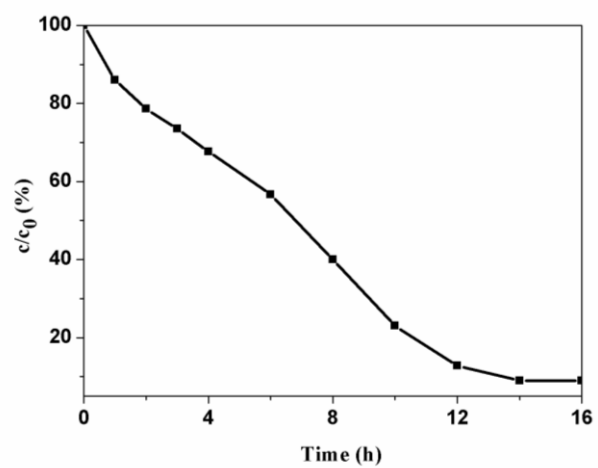

Figure S15. Concentration of  $\text{CrO}_4^{2-}$  as a function of time for TJU-1 in electroplating wastewater.

## References

- S1. Liu, Z.; Ma, R.; Osada, M.; Takada, K.; Sasaki, T. *Journal of the American Chemical Society*, 2015, 127, 13869-13874.
- S2. Fei, H.; Oliver, S. R. J. *Angewandte Chemie International Edition*, 2011, 50, 9066-9070.
- S3. *SHELXTL, Crystal Structure Determination Package*, Bruker Analytical X-ray Systems Inc.: Madison, WI, 1995~99.
- S4. H.-R. Fu, Z.-X. Xu, J. Zhang, *Chemistry of Materials*, 2015, 27, 205.
- S5. L. Aboutorabi, A. Morsali, E. Tahmasebi, O. Büyükgüngör, *Inorganic Chemistry*, 2016, 55, 5507.
- S6. A. V. Desai, B. Manna, A. Karmakar, A. Sahu, S. K. Ghosh, *Angewandte Chemie International Edition*, 2016, 55, 7811.
- S7. X. Li, H. Xu, F. Kong, R. Wang, *Angewandte Chemie International Edition*, 2013, 52, 13769.
- S8. S. Rapti, A. Pournara, D. Sarma, I. T. Papadas, G. S. Armatas, A. C. Tsipis, T. Lazarides, M. G. Kanatzidis, M. J. Manos, *Chemical Science*, 2016, 7, 2427.
- S9. Q. Zhang, J. Yu, J. Cai, L. Zhang, Y. Cui, Y. Yang, B. Chen, G. Qian, *Chemical Communications*, 2015, 51, 14732.
- S10. J. Zhu, S. Wei, H. Gu, S. B. Rapole, Q. Wang, Z. Luo, N. Haldolaarachchige, D. P. Young, Z. Guo, *Environmental Science & Technology*, 2012, 46, 977.
- S11. A. El-Sikaily, A. E. Nemr, A. Khaled, O. Abdelwehab, *Journal of Hazardous Material*, 2007, 148, 216.
- S12. Y. Ying, Y. Liu, X. Wang, Y. Mao, W. Cao, P. Hu, X. Peng, *ACS Applied Materials & Interfaces*, 2015, 7, 1795.
